# Supplementary material
Source: MDPI journal article supplement (https://www.mdpi.com/2076-0760/12/7/403)
Supplement: s1 [file s1]

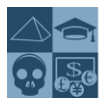

# Civil Society and Social Integration of Asylum Seekers: The ‘Strength of Weak Ties’ and the Dynamics of ‘Strategic Action Fields’

**This PDF file includes:**

Supplementary S1: Survey questions

Survey questions to civil society representatives in all 290 municipalities.

Supplementary S2: Descriptive statistics of the survey

Breakdown of the types of civil society organizations in the survey

Formal definition of the three types of municipalities (dwindling, dynamic, dissenting)

Supplementary S3: Cross tabulations of the survey results

Table S1

Table S2

Table S3

Supplementary S4: Descriptive statistics of the media analysis

### Supplementary S1: Survey questions to civil society representatives in all 290 municipalities.

1. Which municipality do you belong to?
  - What is the main area of activity for your association?
    - Sports
    - Culture
    - Humanitarian work
    - Language
    - Outdoor life
    - Business and finance
    - Religion
    - Policy
    - Integration
    - Training
    - Village community
    - If otherwise, specify
2. What is the size of your association? Answer in approximate number of members.
  - <20
  - 20 - 50
  - 50 - 100
  - 100 - 200
  - 200 - 300
  - 300 - 500
  - > 500
3. What function do you have within your association?
4. Which age group is most common within your association?
  - Children (0-12)
  - Young people (13-20)
  - Young adults (21-30)
  - Adults (30+)
  - Do not know
5. Which gender is most common within your association?
  - Women
  - Men
  - Equal
  - Do not know
6. Are migrants involved in your association right now? (Info: A migrant is a person who is received in a municipality and has been granted a residence permit for residence. One person is a migrant for two to three years)
  - Yes
  - No
7. Have new arrivals joined your association in the last five years?
  - Yes
  - No
8. Have new parents' parents been involved in your association for the past five years?
  - Yes
  - No
9. What is your attitude to migrants' participation in association life?
  - Very negative
  - Negative
  - Neutral

- Positive
  - Very positive
10. Do you have previous experience in integration issues?
- Yes
  - No
11. Is integration specifically part of the association's purpose? (Answer for the last five years.)
- Yes
  - No
12. How actively do you work in your association to reach out and recruit new arrivals? (Answer for the last five years.)
- Not at all
  - Fairly little
  - Neutral
  - Pretty much
  - Very much
13. How much have you in your association directed initiatives or activities to include new arrivals? (Answer for the last five years.)
- Not at all
  - Fairly little
  - Neutral
  - Pretty much
  - Very much
14. How well known is your association among new arrivals? (Answer for the last five years.)
- Very unknown
  - Pretty unknown
  - Neutral
  - Quite well known
  - Very well known
  - Do not know
15. How much do you use social media to reach out to migrants so that they become aware of your association? (Answer for the last five years.)
- Very unknown
  - Pretty unknown
  - Neutral
  - Quite well known
  - Very well known
  - Do not know
16. How much do you use shared social contacts (eg friends and other people near you) to reach out to new arrivals so that they become aware of your association? (Answer for the last five years.)
- Very unknown
  - Pretty unknown
  - Neutral
  - Quite well known
  - Very well known
  - Do not know
17. How much do you use schools and other educations as a platform to reach out to new arrivals so that they get knowledge of your association?(Answer for the last five years.)
- Very unknown
  - Pretty unknown
  - Neutral

- Quite well known
  - Very well known
  - Do not know
18. How much do you use collaboration with other local associations to reach out to new arrivals so that they get knowledge of your association? Answer for the last five years.
- Very unknown
  - Pretty unknown
  - Neutral
  - Quite well known
  - Very well known
  - Do not know
19. How much do you use of cooperation with any part of the municipality's activities to reach out to new arrivals so that they become aware of your association? Answer for the last five years.
- Very unknown
  - Pretty unknown
  - Neutral
  - Quite well known
  - Very well known
  - Do not know
20. How much do you collaborate with the municipality's activities in other areas that have to do with integration? Answer for the last five years.
- Very unknown
  - Pretty unknown
  - Neutral
  - Quite well known
  - Very well known
  - Do not know
21. Is there any special part of the municipality's activities that you have stronger contact / relationship with? In that case, specify below which. Answer for the last five years.
22. Association life in general is important for the inclusion and integration of new arrivals in your municipality. Please fill in if you think this statement is correct or not. Answer for the last five years.
- Very bad
  - True rather bad
  - Neutral
  - True quite well
  - Very true
23. Your association is important for the inclusion and integration of new arrivals in your municipality. Please fill in if you think this statement is correct or not. Answer for the last five years.
- Very bad
  - True rather bad
  - Neutral
  - True quite well
  - Very true
24. Language barriers are an obstacle during activities. Please fill in if you think this statement is correct or not.
- Very bad
  - True rather bad
  - Neutral
  - True quite well
  - Very true
25. Cultural differences among participants are an obstacle during activities. Please fill in if you think this statement is correct or not.

- Very bad
  - True rather bad
  - Neutral
  - True quite well
  - Very true
26. Prejudice from leaders towards migrants is an obstacle during activities. Please fill in if you think this statement is correct or not.
- Very bad
  - True rather bad
  - Neutral
  - True quite well
  - Very true
27. Prejudice from other participants towards new arrivals is an obstacle during activities. Please fill in if you think this statement is correct or not.
- Very bad
  - True rather bad
  - Neutral
  - True quite well
  - Very true
28. Commitment to your association is favorable for new arrivals' future job opportunities. Please fill in if you think this statement is correct or not.
- Very bad
  - True rather bad
  - Neutral
  - True quite well
  - Very true
  - Do not know
29. New arrivals from different cultures are an asset to your association.
- Very bad
  - True rather bad
  - Neutral
  - True quite well
  - Very true
30. Through migrants' involvement in your association, members of the association have gained new cultural knowledge.
- Very bad
  - True rather bad
  - Neutral
  - True quite well
  - Very true
31. Through migrants' involvement in your association, members of the association have developed an increased understanding of different living conditions.
- Very bad
  - True rather bad
  - Neutral
  - True quite well
  - Very true
32. Through migrants' involvement in your association, members of the association have developed other important kinds of knowledge.
- Very bad
  - True rather bad

- Neutral
  - True quite well
  - Very true
33. Through your association and its activities, linguistic knowledge is conveyed to the migrants who participate. Please fill in if you think this statement is correct or not.
- Very bad
  - True rather bad
  - Neutral
  - True quite well
  - Very true
34. Through your association and its activities, working life knowledge is conveyed to the new arrivals who participate. Please fill in if you think this statement is correct or not.
- Very bad
  - True rather bad
  - Neutral
  - True quite well
  - Very true
35. Through your association and its activities, general knowledge of Swedish society is conveyed to them migrants participating. Please fill in if you think this statement is correct or not.
- Very bad
  - True rather bad
  - Neutral
  - True quite well
  - Very true
36. Through your association and its activities, social contacts and networks between new arrivals and others are expanded. Please fill in if you think this statement is correct or not.
- Very bad
  - True rather bad
  - Neutral
  - True quite well
  - Very true
37. How would you describe the association's relationship to the municipality (its politicians and officials)? Answer for the last five. years
- Very bad
  - Pretty bad
  - Neutral
  - Fairly good
  - Very good
38. How would you describe the association's relationship to the local population in the municipality you are active in? Answer for the last five years.
- Very bad
  - Pretty bad
  - Neutral
  - Fairly good
  - Very good
39. What do you feel you have received in response from the municipality (its politicians and officials) for your activities as include new arrivals? Answer for the last five years.
- Very negative
  - Quite negative
  - Neutral
  - Quite positive

- Very positive
40. What do you feel you have received from the locals for your activities that include new arrivals? Answer for the last five years.
- Very negative
  - Quite negative
  - Neutral
  - Quite positive
  - Very positive
41. Are asylum seekers welcome to your association? Answer for the last five years. Info: Asylum seeker is the one who goes to Sweden and applies for protection (asylum) here, but who has not yet received his application decided (Swedish Migration Agency, 2020).
- Yes
  - No
  - Do not know
42. Are undocumented people welcome to your association? Answer for the last five years. Info: The undocumented is the person who avoids the execution of a decision of expulsion or deportation according to the Aliens Act(2005: 716) or who are in Sweden without having applied for the necessary permit to stay in the country (National Board of Health and Welfare, 2019).
- Yes
  - No
  - Do not know
43. Have you received financial support from the municipality for any form of integration work? Answer for the last five years.
- Yes
  - No
  - Do not know
44. Is your association based on some type of belief and if so, which one?
- Yes, Christian
  - Yes, Muslim
  - Yes, Jewish
  - Yes, another
  - No
45. How has your business changed with the outbreak of Covid-19? Describe in max 150 words.
46. Can you imagine setting up an interview within this research project sometime next year?
- Yes
  - No
47. Do you want information about the results of our survey when it is completed? (via your email address)
- Yes
  - No
48. Closing response field for comments. Please write comments and comments about the questionnaire or something you think has been missed.

## Supplementary S2:

## Descriptive statistics of the survey.

| Breakdown of types of civil society associations | Number of responses | Percentage  |
|--------------------------------------------------|---------------------|-------------|
| Sports                                           | 655                 | 49.0%       |
| Culture                                          | 137                 | 10.2%       |
| Humanitarian                                     | 79                  | 5.9%        |
| Language                                         | 5                   | 0.4%        |
| Outdoor activities                               | 100                 | 7.5%        |
| Business and economy                             | 3                   | 0.2%        |
| Religion / faith                                 | 118                 | 8.8%        |
| Political                                        | 8                   | 0.6%        |
| Integration                                      | 34                  | 2.5%        |
| Education                                        | 9                   | 0.7%        |
| Folklore associations                            | 28                  | 2.1%        |
| Other                                            | 152                 | 11.4%       |
| Total                                            | 1,328               | 99.3%       |
| Missing values                                   | 10                  | 0.7%        |
| <b>Grand total</b>                               | <b>1,338</b>        | <b>100%</b> |

## Definition of the three types of municipalities.

| Type of municipality                   | Demographic          |                             |                                               |                                               | Socio-economic                  |                                 |                                    |                                    | Political                   |                        |
|----------------------------------------|----------------------|-----------------------------|-----------------------------------------------|-----------------------------------------------|---------------------------------|---------------------------------|------------------------------------|------------------------------------|-----------------------------|------------------------|
|                                        | min. population 2018 | max. population 2018        | population change (%) from 2010 to 2018, min. | population change (%) from 2010 to 2018, max. | min. un-employment (total) 2018 | max. un-employment (total) 2018 | min. un-employment (Sw. born) 2018 | max. un-employment (Sw. born) 2018 | min. SD votes (%) 2018      | max. SD votes (%) 2018 |
| Type 1: dwindling (32 municipalities)  | 0                    | 20 <sup>th</sup> percentile | -100%                                         | 0%                                            | 40 <sup>th</sup> percentile     | 100%                            | 0%                                 | 100%                               | 0%                          | 100%                   |
| Type 2: dynamic (32 municipalities)    | 0                    | 60 <sup>th</sup> percentile | 0%                                            | 100%                                          | 0%                              | 40 <sup>th</sup> percentile     | 0%                                 | 20 <sup>th</sup> percentile        | 0%                          | 100%                   |
| Type 3: dissenting (29 municipalities) | 0                    | 60 <sup>th</sup> percentile | -100%                                         | 100%                                          | 0%                              | 100%                            | 0%                                 | 100%                               | 90 <sup>th</sup> percentile | 100%                   |



## Supplementary S3. Cross tabulations of the survey results

Table S1.

| Statistical Table 1                                                                             |                   | Chi2 p-value | Dwindling           |            | Dynamic             |            | Dissenting          |            |
|-------------------------------------------------------------------------------------------------|-------------------|--------------|---------------------|------------|---------------------|------------|---------------------|------------|
|                                                                                                 |                   |              | Number of Responses | Percentage | Number of Responses | Percentage | Number of Responses | Percentage |
| Migrants are involved in your organisation now [**]                                             | Yes               | <0.001       | 8                   | 33%        | 19                  | 25%        | 30                  | 27%        |
|                                                                                                 | No                |              | 16                  | 67%        | 56                  | 75%        | 82                  | 73%        |
|                                                                                                 | Total responses   |              | 24                  | 100%       | 75                  | 100%       | 112                 | 100%       |
| Have migrants joined your association in the last five years? [**]                              | Yes               | <0.001       | 15                  | 63%        | 43                  | 57%        | 56                  | 50%        |
|                                                                                                 | No                |              | 9                   | 38%        | 31                  | 41%        | 54                  | 48%        |
|                                                                                                 | Total responses   |              | 24                  | 100%       | 74                  | 99%        | 110                 | 98%        |
| Parents of migrants have been involved (past 5 years) [**]                                      | Yes               | 0.010        | 7                   | 29%        | 14                  | 19%        | 19                  | 17%        |
|                                                                                                 | No                |              | 17                  | 71%        | 61                  | 81%        | 93                  | 83%        |
|                                                                                                 | Total responses   |              | 24                  | 100%       | 75                  | 100%       | 112                 | 100%       |
| Integration is specifically part or your purpose? [**]                                          | Yes               | <0.001       | 13                  | 54%        | 17                  | 22%        | 32                  | 29%        |
|                                                                                                 | No                |              | 11                  | 46%        | 59                  | 78%        | 79                  | 71%        |
|                                                                                                 | Total responses   |              | 24                  | 100%       | 76                  | 100%       | 111                 | 100%       |
| Association life is important for the integration of migrants.                                  | Strongly agree    | 0.683        | 13                  | 54%        | 30                  | 39%        | 35                  | 32%        |
|                                                                                                 | Agree             |              | 10                  | 42%        | 32                  | 42%        | 53                  | 48%        |
|                                                                                                 | Neutral           |              | 1                   | 4%         | 13                  | 17%        | 21                  | 19%        |
|                                                                                                 | Disagree          |              | 0                   | 0%         | 1                   | 1%         | 2                   | 2%         |
|                                                                                                 | Strongly disagree |              | 0                   | 0%         | 0                   | 0%         | 0                   | 0%         |
|                                                                                                 | Total responses   |              | 24                  | 100%       | 76                  | 100%       | 111                 | 100%       |
| What is the attitude towards participation of migrants in your organisation?                    | Very positive     | 0.130        | 11                  | 46%        | 38                  | 50%        | 45                  | 40%        |
|                                                                                                 | Positive          |              | 12                  | 50%        | 27                  | 36%        | 49                  | 44%        |
|                                                                                                 | Neutral           |              | 1                   | 4%         | 9                   | 12%        | 17                  | 15%        |
|                                                                                                 | Negative          |              | 0                   | 0%         | 2                   | 3%         | 1                   | 1%         |
|                                                                                                 | Very negative     |              | 0                   | 0%         | 0                   | 0%         | 0                   | 0%         |
|                                                                                                 | Total responses   |              | 24                  | 100%       | 76                  | 100%       | 112                 | 100%       |
| Migrants from different cultures are an asset in your association                               | Strongly agree    | 0.086        | 8                   | 33%        | 12                  | 16%        | 19                  | 17%        |
|                                                                                                 | Agree             |              | 8                   | 33%        | 30                  | 40%        | 41                  | 37%        |
|                                                                                                 | Neutral           |              | 8                   | 33%        | 27                  | 36%        | 44                  | 39%        |
|                                                                                                 | Disagree          |              | 0                   | 0%         | 3                   | 4%         | 4                   | 4%         |
|                                                                                                 | Strongly disagree |              | 0                   | 0%         | 3                   | 4%         | 4                   | 4%         |
|                                                                                                 | Total responses   |              | 24                  | 100%       | 75                  | 100%       | 112                 | 100%       |
| How actively do you work to reach out and recruit migrants? [**]                                | Very much         | 0.005        | 1                   | 4%         | 4                   | 5%         | 2                   | 2%         |
|                                                                                                 | Much              |              | 7                   | 29%        | 12                  | 16%        | 12                  | 11%        |
|                                                                                                 | Neutral           |              | 9                   | 38%        | 30                  | 39%        | 48                  | 43%        |
|                                                                                                 | Little            |              | 5                   | 21%        | 19                  | 25%        | 29                  | 26%        |
|                                                                                                 | Not at all        |              | 2                   | 8%         | 11                  | 14%        | 20                  | 18%        |
|                                                                                                 | Total responses   |              | 24                  | 100%       | 76                  | 100%       | 111                 | 100%       |
| Social contacts and networks between migrants and others are promoted through your association. | Strongly agree    | 0.120        | 5                   | 21%        | 14                  | 19%        | 9                   | 8%         |
|                                                                                                 | Agree             |              | 13                  | 54%        | 29                  | 39%        | 50                  | 45%        |
|                                                                                                 | Neutral           |              | 4                   | 17%        | 21                  | 28%        | 42                  | 38%        |
|                                                                                                 | Disagree          |              | 1                   | 4%         | 6                   | 8%         | 5                   | 5%         |
|                                                                                                 | Strongly disagree |              | 1                   | 4%         | 5                   | 7%         | 5                   | 5%         |
|                                                                                                 | Total responses   |              | 24                  | 100%       | 75                  | 100%       | 111                 | 100%       |

| Statistical Table 1 (cont.)                                                                                                                     |                   | Chi2 p-value | Dwindling           |            | Dynamic             |            | Dissenting          |            |
|-------------------------------------------------------------------------------------------------------------------------------------------------|-------------------|--------------|---------------------|------------|---------------------|------------|---------------------|------------|
|                                                                                                                                                 |                   |              | Number of Responses | Percentage | Number of Responses | Percentage | Number of Responses | Percentage |
| Members of your association gain new cultural knowledge through involvement of migrants                                                         | Strongly agree    | 0.087        | 2                   | 8%         | 8                   | 11%        | 8                   | 7%         |
|                                                                                                                                                 | Agree             |              | 12                  | 50%        | 23                  | 31%        | 22                  | 20%        |
|                                                                                                                                                 | Neutral           |              | 8                   | 33%        | 33                  | 44%        | 53                  | 49%        |
|                                                                                                                                                 | Disagree          |              | 1                   | 4%         | 4                   | 5%         | 13                  | 12%        |
|                                                                                                                                                 | Strongly disagree |              | 1                   | 4%         | 7                   | 9%         | 13                  | 12%        |
|                                                                                                                                                 | Total responses   |              | 24                  | 100%       | 75                  | 100%       | 109                 | 100%       |
| Your members have gain increased understanding of different living conditions through involvement of migrants [*]                               | Strongly agree    | 0.029        | 0                   | 0%         | 5                   | 7%         | 7                   | 6%         |
|                                                                                                                                                 | Agree             |              | 13                  | 54%        | 27                  | 36%        | 32                  | 29%        |
|                                                                                                                                                 | Neutral           |              | 10                  | 42%        | 30                  | 41%        | 52                  | 46%        |
|                                                                                                                                                 | Disagree          |              | 0                   | 0%         | 7                   | 9%         | 9                   | 8%         |
|                                                                                                                                                 | Strongly disagree |              | 1                   | 4%         | 5                   | 7%         | 12                  | 11%        |
|                                                                                                                                                 | Total responses   |              | 24                  | 100%       | 74                  | 100%       | 112                 | 100%       |
| How would you describe the association's relationship to the municipality (its politicians and officials)?                                      | Very bad          | 0.405        | 0                   | 0%         | 0                   | 0%         | 3                   | 3%         |
|                                                                                                                                                 | Somewhat bad      |              | 0                   | 0%         | 6                   | 8%         | 9                   | 8%         |
|                                                                                                                                                 | Neutral           |              | 3                   | 13%        | 15                  | 20%        | 19                  | 17%        |
|                                                                                                                                                 | Somewhat good     |              | 13                  | 54%        | 32                  | 42%        | 56                  | 50%        |
|                                                                                                                                                 | Very good         |              | 8                   | 33%        | 23                  | 30%        | 24                  | 22%        |
|                                                                                                                                                 | Total responses   |              | 24                  | 100%       | 76                  | 100%       | 111                 | 100%       |
| What do you feel you have received in response from the municipality (its politicians and officials) for your activities that include migrants? | Very positive     | 0.126        | 8                   | 33%        | 10                  | 14%        | 9                   | 8%         |
|                                                                                                                                                 | Positive          |              | 4                   | 17%        | 13                  | 18%        | 24                  | 22%        |
|                                                                                                                                                 | Neutral           |              | 12                  | 50%        | 49                  | 66%        | 69                  | 63%        |
|                                                                                                                                                 | Negative          |              | 0                   | 0%         | 2                   | 3%         | 7                   | 6%         |
|                                                                                                                                                 | Very negative     |              | 0                   | 0%         | 0                   | 0%         | 1                   | 1%         |
|                                                                                                                                                 | Total responses   |              | 24                  | 100%       | 74                  | 100%       | 110                 | 100%       |
| How would you describe the association's relationship to the local population in the municipality you are active in?                            | Very positive     | 0.569        | 14                  | 58%        | 32                  | 42%        | 49                  | 45%        |
|                                                                                                                                                 | Positive          |              | 9                   | 38%        | 35                  | 46%        | 50                  | 45%        |
|                                                                                                                                                 | Neutral           |              | 1                   | 4%         | 7                   | 9%         | 11                  | 10%        |
|                                                                                                                                                 | Negative          |              | 0                   | 0%         | 1                   | 1%         | 0                   | 0%         |
|                                                                                                                                                 | Very negative     |              | 0                   | 0%         | 1                   | 1%         | 0                   | 0%         |
|                                                                                                                                                 | Total responses   |              | 24                  | 100%       | 76                  | 100%       | 110                 | 100%       |
| What do you feel you have received in response from the local population for your activities that include migrants?                             | Very positive     | 0.951        | 4                   | 17%        | 8                   | 11%        | 8                   | 7%         |
|                                                                                                                                                 | Positive          |              | 8                   | 33%        | 15                  | 20%        | 23                  | 21%        |
|                                                                                                                                                 | Neutral           |              | 12                  | 50%        | 51                  | 68%        | 73                  | 68%        |
|                                                                                                                                                 | Negative          |              | 0                   | 0%         | 1                   | 1%         | 4                   | 4%         |
|                                                                                                                                                 | Very negative     |              | 0                   | 0%         | 0                   | 0%         | 0                   | 0%         |
|                                                                                                                                                 | Total responses   |              | 24                  | 100%       | 75                  | 100%       | 108                 | 100%       |
| Have you received financial support from the municipality for any form of integration activity?                                                 | Yes               | 0.198        | 8                   | 36%        | 12                  | 18%        | 13                  | 13%        |
|                                                                                                                                                 | No                |              | 14                  | 64%        | 53                  | 82%        | 84                  | 87%        |
|                                                                                                                                                 | Total responses   |              | 22                  | 100%       | 65                  | 100%       | 97                  | 100%       |
| Do you feel that the municipality's goals for integration and your goals for integration agree well?                                            | Yes               | 0.443        | 7                   | 58%        | 5                   | 36%        | 8                   | 31%        |
|                                                                                                                                                 | Partly            |              | 4                   | 33%        | 7                   | 50%        | 17                  | 65%        |
|                                                                                                                                                 | No                |              | 1                   | 8%         | 2                   | 14%        | 1                   | 4%         |
|                                                                                                                                                 | Total responses   |              | 12                  | 100%       | 14                  | 100%       | 26                  | 100%       |

Table S2.

Survey results cross tabulation with Chi-2 tests, for three types of rural municipalities.

Table S2.

| Statistical Table 2                                                                              |                   | Chi2 p-value | Small (< 50 000 inh.) |            | Medium sized (100 000 – 50 000) |            | Major cities (> 100 000 inh.) |            | All municipalities  |            |
|--------------------------------------------------------------------------------------------------|-------------------|--------------|-----------------------|------------|---------------------------------|------------|-------------------------------|------------|---------------------|------------|
|                                                                                                  |                   |              | Number of Responses   | Percentage | Number of Responses             | Percentage | Number of Responses           | Percentage | Number of Responses | Percentage |
| Migrants are involved in your association now [*]                                                | Yes               | 0.011        | 214                   | 34%        | 84                              | 37%        | 143                           | 46%        | 441                 | 38%        |
|                                                                                                  | No                |              | 413                   | 66%        | 144                             | 63%        | 169                           | 54%        | 726                 | 62%        |
|                                                                                                  | Total responses   |              | 629                   | 100%       | 228                             | 100%       | 313                           | 100%       | 1170                | 100%       |
| Have migrants joined your association in the last five years?                                    | Yes               | 0.212        | 339                   | 54%        | 138                             | 61%        | 190                           | 61%        | 667                 | 57%        |
|                                                                                                  | No                |              | 284                   | 45%        | 87                              | 38%        | 120                           | 38%        | 491                 | 42%        |
|                                                                                                  | Total responses   |              | 629                   | 100%       | 228                             | 100%       | 313                           | 100%       | 1170                | 100%       |
| Parents of migrants are involved in your association (past 5 years)                              | Yes               | 0.147        | 135                   | 22%        | 55                              | 24%        | 85                            | 28%        | 275                 | 24%        |
|                                                                                                  | No                |              | 489                   | 78%        | 173                             | 76%        | 224                           | 72%        | 886                 | 76%        |
|                                                                                                  | Total responses   |              | 624                   | 100%       | 228                             | 100%       | 309                           | 100%       | 1161                | 100%       |
| Integration is specifically part of your purpose? [**]                                           | Yes               | 0.002        | 194                   | 31%        | 83                              | 37%        | 138                           | 44%        | 415                 | 36%        |
|                                                                                                  | No                |              | 433                   | 69%        | 144                             | 63%        | 175                           | 56%        | 752                 | 64%        |
|                                                                                                  | Total responses   |              | 627                   | 100%       | 227                             | 100%       | 313                           | 100%       | 1167                | 100%       |
| Association life is important for the integration of migrants. [*]                               | Strongly agree    | 0.011        | 229                   | 37%        | 101                             | 44%        | 126                           | 40%        | 456                 | 39%        |
|                                                                                                  | Agree             |              | 271                   | 43%        | 96                              | 42%        | 124                           | 40%        | 491                 | 42%        |
|                                                                                                  | Neutral           |              | 110                   | 18%        | 23                              | 10%        | 51                            | 16%        | 184                 | 16%        |
|                                                                                                  | Disagree          |              | 13                    | 2%         | 7                               | 3%         | 4                             | 1%         | 24                  | 2%         |
|                                                                                                  | Strongly disagree |              | 4                     | 1%         | 0                               | 0%         | 7                             | 2%         | 11                  | 1%         |
|                                                                                                  | Total responses   |              | 627                   | 100%       | 227                             | 100%       | 312                           | 100%       | 1166                | 100%       |
| What is the attitude towards participation of migrants in your organisation?                     | Very positive     | 0.115        | 280                   | 45%        | 1217                            | 92%        | 155                           | 50%        | 1652                | 73%        |
|                                                                                                  | Positive          |              | 252                   | 40%        | 81                              | 6%         | 108                           | 35%        | 441                 | 20%        |
|                                                                                                  | Neutral           |              | 85                    | 14%        | 18                              | 1%         | 45                            | 14%        | 148                 | 7%         |
|                                                                                                  | Negative          |              | 9                     | 1%         | 1                               | 0%         | 4                             | 1%         | 14                  | 1%         |
|                                                                                                  | Very negative     |              | 1                     | 0%         | 1                               | 0%         | 1                             | 0%         | 3                   | 0%         |
|                                                                                                  | Total responses   |              | 627                   | 100%       | 1318                            | 100%       | 313                           | 100%       | 2258                | 100%       |
| Migrants from different cultures are an asset in your association                                | Strongly agree    | 0.107        | 135                   | 22%        | 65                              | 29%        | 91                            | 29%        | 291                 | 25%        |
|                                                                                                  | Agree             |              | 221                   | 35%        | 83                              | 37%        | 90                            | 29%        | 394                 | 34%        |
|                                                                                                  | Neutral           |              | 215                   | 35%        | 61                              | 27%        | 102                           | 33%        | 378                 | 33%        |
|                                                                                                  | Disagree          |              | 26                    | 4%         | 9                               | 4%         | 12                            | 4%         | 47                  | 4%         |
|                                                                                                  | Strongly disagree |              | 26                    | 4%         | 7                               | 3%         | 14                            | 5%         | 47                  | 4%         |
|                                                                                                  | Total responses   |              | 623                   | 100%       | 225                             | 100%       | 309                           | 100%       | 1157                | 100%       |
| How actively do you work to reach out and recruit migrants?                                      | Very much         | 0.434        | 27                    | 4%         | 10                              | 4%         | 18                            | 6%         | 55                  | 5%         |
|                                                                                                  | Much              |              | 103                   | 16%        | 44                              | 19%        | 69                            | 22%        | 216                 | 19%        |
|                                                                                                  | Neutral           |              | 237                   | 38%        | 84                              | 37%        | 105                           | 34%        | 426                 | 37%        |
|                                                                                                  | Little            |              | 136                   | 22%        | 46                              | 20%        | 52                            | 17%        | 234                 | 20%        |
|                                                                                                  | Not at all        |              | 123                   | 20%        | 44                              | 19%        | 68                            | 22%        | 235                 | 20%        |
|                                                                                                  | Total responses   |              | 626                   | 100%       | 228                             | 100%       | 312                           | 100%       | 1166                | 100%       |
| Your association is important for the inclusion and integration of migrants in your municipality | Strongly agree    | 0.486        | 93                    | 15%        | 40                              | 18%        | 55                            | 19%        | 188                 | 16%        |
|                                                                                                  | Agree             |              | 176                   | 28%        | 55                              | 24%        | 80                            | 28%        | 311                 | 27%        |
|                                                                                                  | Neutral           |              | 236                   | 38%        | 81                              | 36%        | 102                           | 36%        | 419                 | 37%        |
|                                                                                                  | Disagree          |              | 79                    | 13%        | 36                              | 16%        | 44                            | 15%        | 159                 | 14%        |
|                                                                                                  | Strongly disagree |              | 43                    | 7%         | 16                              | 7%         | 5                             | 2%         | 64                  | 6%         |
|                                                                                                  | Total responses   |              | 627                   | 100%       | 228                             | 100%       | 286                           | 100%       | 1141                | 100%       |

| Statistical Table 2 (cont.)                                                                                                                     |                   | Chi2 p-value | Small (< 50 000 inh.) |            | Medium sized (100 000 – 50 000) |            | Major cities (> 100 000 inh.) |            | All municipalities  |            |
|-------------------------------------------------------------------------------------------------------------------------------------------------|-------------------|--------------|-----------------------|------------|---------------------------------|------------|-------------------------------|------------|---------------------|------------|
|                                                                                                                                                 |                   |              | Number of Responses   | Percentage | Number of Responses             | Percentage | Number of Responses           | Percentage | Number of Responses | Percentage |
| Members of your association gain new cultural knowledge through involvement of migrants                                                         | Strongly agree    | 0.355        | 2                     | 8%         | 8                               | 11%        | 8                             | 7%         | 18                  | 9%         |
|                                                                                                                                                 | Agree             |              | 12                    | 50%        | 23                              | 31%        | 22                            | 20%        | 57                  | 27%        |
|                                                                                                                                                 | Neutral           |              | 8                     | 33%        | 33                              | 44%        | 53                            | 49%        | 94                  | 45%        |
|                                                                                                                                                 | Disagree          |              | 1                     | 4%         | 4                               | 5%         | 13                            | 12%        | 18                  | 9%         |
|                                                                                                                                                 | Strongly disagree |              | 1                     | 4%         | 7                               | 9%         | 13                            | 12%        | 21                  | 10%        |
|                                                                                                                                                 | Total responses   |              | 24                    | 100%       | 75                              | 100%       | 109                           | 100%       | 208                 | 100%       |
| Your members have gain increased understanding of different living conditions through involvement of migrants                                   | Strongly agree    | 0.136        | 0                     | 0%         | 5                               | 7%         | 7                             | 6%         | 12                  | 6%         |
|                                                                                                                                                 | Agree             |              | 13                    | 54%        | 27                              | 36%        | 32                            | 29%        | 72                  | 34%        |
|                                                                                                                                                 | Neutral           |              | 10                    | 42%        | 30                              | 41%        | 52                            | 46%        | 92                  | 44%        |
|                                                                                                                                                 | Disagree          |              | 0                     | 0%         | 7                               | 9%         | 9                             | 8%         | 16                  | 8%         |
|                                                                                                                                                 | Strongly disagree |              | 1                     | 4%         | 5                               | 7%         | 12                            | 11%        | 18                  | 9%         |
|                                                                                                                                                 | Total responses   |              | 24                    | 100%       | 74                              | 100%       | 112                           | 100%       | 210                 | 100%       |
| How would you describe the association's relationship to the municipality (its politicians and officials)? [**]                                 | Very bad          | <0.001       | 10                    | 2%         | 1                               | 0%         | 10                            | 3%         | 21                  | 2%         |
|                                                                                                                                                 | Somewhat bad      |              | 46                    | 7%         | 24                              | 11%        | 29                            | 9%         | 99                  | 9%         |
|                                                                                                                                                 | Neutral           |              | 126                   | 20%        | 40                              | 18%        | 102                           | 33%        | 268                 | 23%        |
|                                                                                                                                                 | Somewhat good     |              | 273                   | 44%        | 106                             | 47%        | 115                           | 37%        | 494                 | 43%        |
|                                                                                                                                                 | Very good         |              | 170                   | 27%        | 56                              | 25%        | 51                            | 17%        | 277                 | 24%        |
|                                                                                                                                                 | Total responses   |              | 625                   | 100%       | 227                             | 100%       | 307                           | 100%       | 1159                | 100%       |
| What do you feel you have received in response from the municipality (its politicians and officials) for your activities that include migrants? | Very positive     | 0.159        | 96                    | 16%        | 33                              | 15%        | 37                            | 12%        | 166                 | 15%        |
|                                                                                                                                                 | Positive          |              | 138                   | 23%        | 43                              | 20%        | 50                            | 17%        | 231                 | 20%        |
|                                                                                                                                                 | Neutral           |              | 363                   | 59%        | 138                             | 63%        | 201                           | 67%        | 702                 | 62%        |
|                                                                                                                                                 | Negative          |              | 12                    | 2%         | 5                               | 2%         | 13                            | 4%         | 30                  | 3%         |
|                                                                                                                                                 | Very negative     |              | 4                     | 1%         | 1                               | 0%         | 1                             | 0%         | 6                   | 1%         |
|                                                                                                                                                 | Total responses   |              | 613                   | 100%       | 220                             | 100%       | 302                           | 100%       | 1135                | 100%       |
| How would you describe the association's relationship to the local population in the municipality you are active in? [**]                       | Very positive     | <0.001       | 288                   | 46%        | 90                              | 40%        | 101                           | 33%        | 479                 | 41%        |
|                                                                                                                                                 | Positive          |              | 271                   | 43%        | 102                             | 45%        | 141                           | 45%        | 514                 | 44%        |
|                                                                                                                                                 | Neutral           |              | 58                    | 9%         | 32                              | 14%        | 63                            | 20%        | 153                 | 13%        |
|                                                                                                                                                 | Negative          |              | 6                     | 1%         | 2                               | 1%         | 3                             | 1%         | 11                  | 1%         |
|                                                                                                                                                 | Very negative     |              | 1                     | 0%         | 1                               | 0%         | 2                             | 1%         | 4                   | 0%         |
|                                                                                                                                                 | Total responses   |              | 624                   | 100%       | 227                             | 100%       | 310                           | 100%       | 1161                | 100%       |
| What do you feel you have received in response from the local population for your activities that include migrants?                             | Very positive     | 0.178        | 59                    | 10%        | 25                              | 11%        | 33                            | 11%        | 117                 | 10%        |
|                                                                                                                                                 | Positive          |              | 145                   | 24%        | 55                              | 25%        | 53                            | 17%        | 253                 | 22%        |
|                                                                                                                                                 | Neutral           |              | 396                   | 65%        | 133                             | 61%        | 207                           | 68%        | 736                 | 65%        |
|                                                                                                                                                 | Negative          |              | 9                     | 1%         | 6                               | 3%         | 9                             | 3%         | 24                  | 2%         |
|                                                                                                                                                 | Very negative     |              | 1                     | 0%         | 0                               | 0%         | 2                             | 1%         | 3                   | 0%         |
|                                                                                                                                                 | Total responses   |              | 610                   | 100%       | 219                             | 100%       | 304                           | 100%       | 1133                | 100%       |
| Have you received financial support from the municipality for any form of integration activity?                                                 | Yes               | 0.949        | 124                   | 22%        | 50                              | 24%        | 64                            | 22%        | 238                 | 21%        |
|                                                                                                                                                 | No                |              | 449                   | 78%        | 159                             | 76%        | 227                           | 78%        | 835                 | 74%        |
|                                                                                                                                                 | Total responses   |              | 573                   | 100%       | 209                             | 100%       | 291                           | 100%       | 1073                | 95%        |

Table S2. Survey results cross tabulation with Chi-2 tests, for three size categories of municipalities, and the entire data material.

Table S3.

| Statistical Table 3                                                              |                   | Chi2 p-value | Non faith based     |            | Faith based         |            |
|----------------------------------------------------------------------------------|-------------------|--------------|---------------------|------------|---------------------|------------|
|                                                                                  |                   |              | Number of Responses | Percentage | Number of Responses | Percentage |
| Migrants are involved in your organisation now [**]                              | Yes               | <0.001       | 407                 | 36%        | 85                  | 52%        |
|                                                                                  | No                |              | 724                 | 64%        | 79                  | 48%        |
|                                                                                  | Total responses   |              | 1131                | 100%       | 164                 | 100%       |
| Have migrants joined your association in the last five years? [**]               | Yes               | <0.001       | 614                 | 54%        | 124                 | 76%        |
|                                                                                  | No                |              | 507                 | 45%        | 39                  | 24%        |
|                                                                                  | Total responses   |              | 1121                | 99%        | 163                 | 99%        |
| Parents of migrants have been involved (past 5 years) [**]                       | Yes               | <0.001       | 226                 | 20%        | 80                  | 49%        |
|                                                                                  | No                |              | 900                 | 80%        | 84                  | 51%        |
|                                                                                  | Total responses   |              | 1126                | 100%       | 164                 | 100%       |
| Integration is specifically part of your purpose? [**]                           | Yes               | <0.001       | 372                 | 33%        | 84                  | 51%        |
|                                                                                  | No                |              | 760                 | 67%        | 81                  | 49%        |
|                                                                                  | Total responses   |              | 1132                | 100%       | 165                 | 100%       |
| Association life is important for the integration of migrants.                   | Strongly agree    | 0.371        | 431                 | 38%        | 70                  | 40%        |
|                                                                                  | Agree             |              | 482                 | 43%        | 83                  | 47%        |
|                                                                                  | Neutral           |              | 186                 | 16%        | 21                  | 12%        |
|                                                                                  | Disagree          |              | 23                  | 2%         | 2                   | 1%         |
|                                                                                  | Strongly disagree |              | 12                  | 1%         | 0                   | 0%         |
|                                                                                  | Total responses   |              | 1134                | 100%       | 176                 | 100%       |
| What is the attitude towards participation of migrants in your organisation? [*] | Very positive     | 0.028        | 523                 | 46%        | 96                  | 58%        |
|                                                                                  | Positive          |              | 438                 | 39%        | 57                  | 34%        |
|                                                                                  | Neutral           |              | 154                 | 14%        | 10                  | 6%         |
|                                                                                  | Negative          |              | 15                  | 1%         | 3                   | 2%         |
|                                                                                  | Very negative     |              | 4                   | 0%         | 0                   | 0%         |
|                                                                                  | Total responses   |              | 1134                | 100%       | 166                 | 100%       |
| Migrants from different cultures are an asset in your association [**]           | Strongly agree    | 0.002        | 256                 | 23%        | 51                  | 31%        |
|                                                                                  | Agree             |              | 384                 | 34%        | 69                  | 42%        |
|                                                                                  | Neutral           |              | 390                 | 35%        | 34                  | 21%        |
|                                                                                  | Disagree          |              | 49                  | 4%         | 5                   | 3%         |
|                                                                                  | Strongly disagree |              | 48                  | 4%         | 4                   | 2%         |
|                                                                                  | Total responses   |              | 1127                | 100%       | 163                 | 100%       |
| How actively do you work to reach out and recruit migrants? [**]                 | Very much         | <0.001       | 53                  | 5%         | 4                   | 2%         |
|                                                                                  | Much              |              | 188                 | 17%        | 49                  | 30%        |
|                                                                                  | Neutral           |              | 428                 | 38%        | 60                  | 36%        |
|                                                                                  | Little            |              | 207                 | 18%        | 38                  | 23%        |
|                                                                                  | Not at all        |              | 257                 | 23%        | 14                  | 8%         |
|                                                                                  | Total responses   |              | 1133                | 100%       | 165                 | 100%       |

| Statistical Table 3 (cont.)                                                                                                                     |                   | Chi2 p-value | Non faith based     |            | Faith based         |            |
|-------------------------------------------------------------------------------------------------------------------------------------------------|-------------------|--------------|---------------------|------------|---------------------|------------|
|                                                                                                                                                 |                   |              | Number of Responses | Percentage | Number of Responses | Percentage |
| Social contacts and networks between migrants and others are promoted through your association.                                                 | Strongly agree    | 0.071        | 168                 | 15%        | 30                  | 18%        |
|                                                                                                                                                 | Agree             |              | 290                 | 26%        | 56                  | 34%        |
|                                                                                                                                                 | Neutral           |              | 416                 | 37%        | 55                  | 33%        |
|                                                                                                                                                 | Disagree          |              | 172                 | 15%        | 16                  | 10%        |
|                                                                                                                                                 | Strongly disagree |              | 86                  | 8%         | 9                   | 5%         |
|                                                                                                                                                 | Total responses   |              | 1132                | 100%       | 166                 | 100%       |
| Members of your association gain new cultural knowledge through involvement of migrants [**]                                                    | Strongly agree    | <0.001       | 116                 | 10%        | 41                  | 25%        |
|                                                                                                                                                 | Agree             |              | 278                 | 25%        | 65                  | 40%        |
|                                                                                                                                                 | Neutral           |              | 487                 | 43%        | 37                  | 23%        |
|                                                                                                                                                 | Disagree          |              | 108                 | 10%        | 10                  | 6%         |
|                                                                                                                                                 | Strongly disagree |              | 131                 | 12%        | 11                  | 7%         |
|                                                                                                                                                 | Total responses   |              | 1120                | 100%       | 164                 | 100%       |
| Your members have gain increased understanding of different living conditions through involvement of migrants [**]                              | Strongly agree    | <0.001       | 111                 | 10%        | 37                  | 22%        |
|                                                                                                                                                 | Agree             |              | 307                 | 27%        | 75                  | 45%        |
|                                                                                                                                                 | Neutral           |              | 499                 | 45%        | 35                  | 21%        |
|                                                                                                                                                 | Disagree          |              | 95                  | 8%         | 7                   | 4%         |
|                                                                                                                                                 | Strongly disagree |              | 107                 | 10%        | 11                  | 7%         |
|                                                                                                                                                 | Total responses   |              | 1119                | 100%       | 165                 | 100%       |
| How would you describe the association's relationship to the municipality (its politicians and officials)?                                      | Very bad          | 0.126        | 284                 | 25%        | 34                  | 20%        |
|                                                                                                                                                 | Somewhat bad      |              | 462                 | 41%        | 81                  | 49%        |
|                                                                                                                                                 | Neutral           |              | 258                 | 23%        | 41                  | 25%        |
|                                                                                                                                                 | Somewhat good     |              | 102                 | 9%         | 8                   | 5%         |
|                                                                                                                                                 | Very good         |              | 23                  | 2%         | 2                   | 1%         |
|                                                                                                                                                 | Total responses   |              | 1129                | 100%       | 166                 | 100%       |
| What do you feel you have received in response from the municipality (its politicians and officials) for your activities that include migrants? | Very positive     | 0.587        | 156                 | 14%        | 27                  | 17%        |
|                                                                                                                                                 | Positive          |              | 218                 | 20%        | 36                  | 22%        |
|                                                                                                                                                 | Neutral           |              | 691                 | 62%        | 95                  | 59%        |
|                                                                                                                                                 | Negative          |              | 32                  | 3%         | 4                   | 2%         |
|                                                                                                                                                 | Very negative     |              | 9                   | 1%         | 0                   | 0%         |
|                                                                                                                                                 | Total responses   |              | 1106                | 100%       | 162                 | 100%       |
| How would you describe the association's relationship to the local population in the municipality you are active in?                            | Very positive     | 0.121        | 479                 | 42%        | 61                  | 37%        |
|                                                                                                                                                 | Positive          |              | 489                 | 43%        | 75                  | 45%        |
|                                                                                                                                                 | Neutral           |              | 151                 | 13%        | 27                  | 16%        |
|                                                                                                                                                 | Negative          |              | 11                  | 1%         | 1                   | 1%         |
|                                                                                                                                                 | Very negative     |              | 2                   | 0%         | 2                   | 1%         |
|                                                                                                                                                 | Total responses   |              | 1132                | 100%       | 166                 | 100%       |
| What do you feel you have received in response from the local population for your activities that include migrants? [*]                         | Very positive     | 0.044        | 112                 | 10%        | 19                  | 12%        |
|                                                                                                                                                 | Positive          |              | 230                 | 21%        | 49                  | 30%        |
|                                                                                                                                                 | Neutral           |              | 741                 | 67%        | 89                  | 55%        |
|                                                                                                                                                 | Negative          |              | 23                  | 2%         | 4                   | 2%         |
|                                                                                                                                                 | Very negative     |              | 3                   | 0%         | 0                   | 0%         |
|                                                                                                                                                 | Total responses   |              | 1109                | 100%       | 161                 | 100%       |
| Have you received financial support from the municipality for any form of integration activity? [**]                                            | Yes               | 0.007        | 226                 | 21%        | 40                  | 27%        |
|                                                                                                                                                 | No                |              | 852                 | 79%        | 109                 | 73%        |
|                                                                                                                                                 | Total responses   |              | 1078                | 100%       | 149                 | 100%       |

Table S3. Survey results cross tabulation with Chi-2 tests, for faith-based and non-faith-based civil society organizations.

**Supplementary S4: Descriptive statistics of the media analysis**

| Name of newspaper            | No of articles | percentage |
|------------------------------|----------------|------------|
| <b>"Sjöbo"</b>               |                |            |
| Sydsvenska Dagbladet         | 56             | 20%        |
| Skånska Dagbladet            | 61             | 22%        |
| Ystads Allehanda             | 134            | 49%        |
| Norra Skåne                  | 10             | 4%         |
| Kristianstadsbladet          | 15             | 5%         |
| Total "Sjöbo"                | 276            | 100%       |
| <b>"Gnosjö"</b>              |                |            |
| Värnamo Nyheter              | 2              | 4%         |
| Jönköpingsposten             | 20             | 44%        |
| Smålandstidningen            | 13             | 29%        |
| Smålands Dagblad             | 1              | 2%         |
| Smälänningen                 | 2              | 4%         |
| Jönköping Nu                 | 7              | 16%        |
| Total "Gnosjö"               | 45             | 100%       |
| <b>"Åsele"</b>               |                |            |
| Västerbottens-Kuriren        | 32             | 49%        |
| Västerbottningen             | 9              | 14%        |
| Västerbottens Mellanbygd     | 2              | 3%         |
| Folkbladet Västerbotten      | 18             | 28%        |
| Norrländska Socialdemokraten | 3              | 5%         |
| Folkbladet Västerbotten      | 1              | 2%         |
| Total "Åsele"                | 65             | 100%       |
|                              |                |            |
| Grand total                  | 386            |            |
